# Supplementary material
Source: publisher site journal article supplement (https://www.spandidos-publications.com/714/downloadSupplementary)

Figure S1. Flow cytometric analysis of the apoptotic effect of DDP on SKOV3 cells. Percentages of apoptotic cells are the sum of the proportion of cells in the upper right and lower right quadrants. Results are typical of three independent experiments. Data are presented as the mean  $\pm$  SD (n=3). Intergroup differences were analyzed using one-way ANOVA. Tukey's post hoc test was used for the multiple comparisons among the various groups. \*\*\*P<0.001 vs. control. DDP, cisplatin.

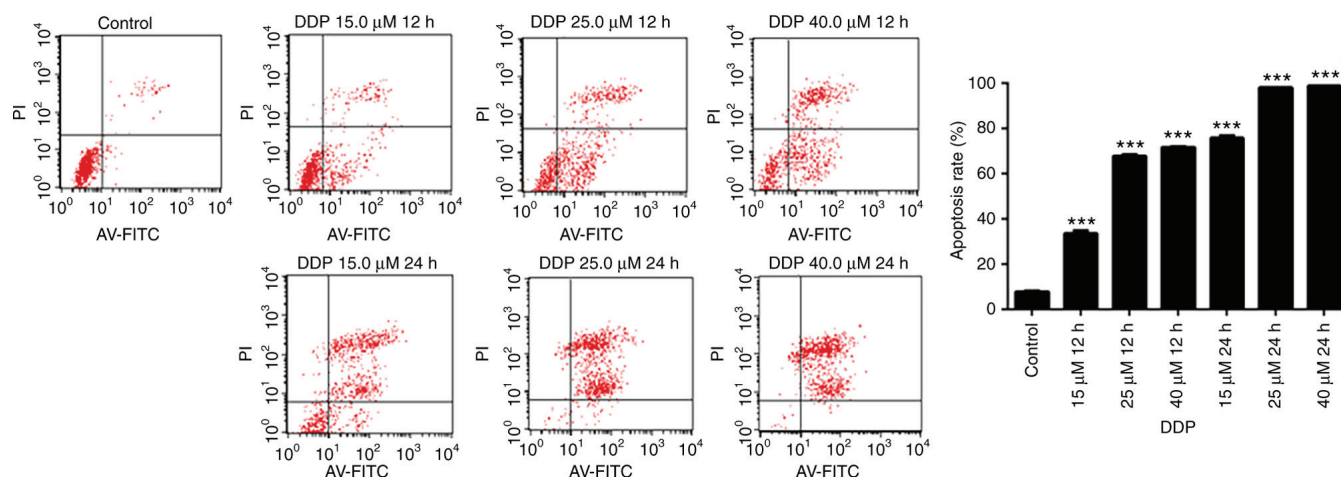

Figure S2. Differentially expressed genes and proteins. Volcanic maps representing the overall distribution of the differentially expressed genes/proteins. The left shows the RNA-Seq results and the right shows the proteomic results. The abscissa represents the fold change in expression of genes/proteins in the M2 macrophages compared with that in the M0 macrophages. The ordinate represents the statistical significance of the difference in the level of gene expression. Red dots indicate genes/proteins with significantly upregulated gene expression, whereas green dots indicate significantly downregulated genes/proteins in the M2 macrophages.

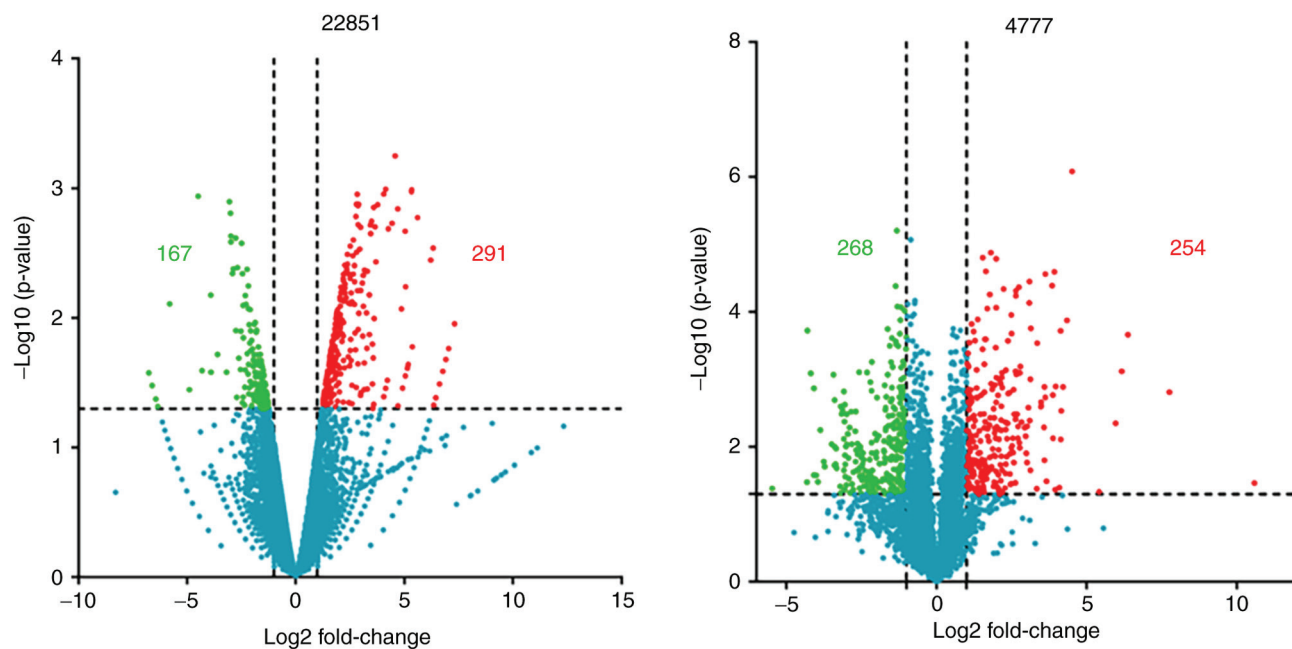

Figure S3. Relative mRNA expression levels for iNOS and IL12 in M0, M1 and M2 macrophages determined by reverse transcription-quantitative PCR analysis. GAPDH was used as an internal standard. The results are typical of three independent experiments. Data are presented as the mean  $\pm$  SD (n=3). Intergroup differences were analyzed using one-way ANOVA. Tukey's post hoc test was used for multiple comparisons among the various groups. ##P<0.01 and \*\*\*P<0.001 vs. M0 macrophages. iNOS, inducible nitric oxide synthase; IL, interleukin.

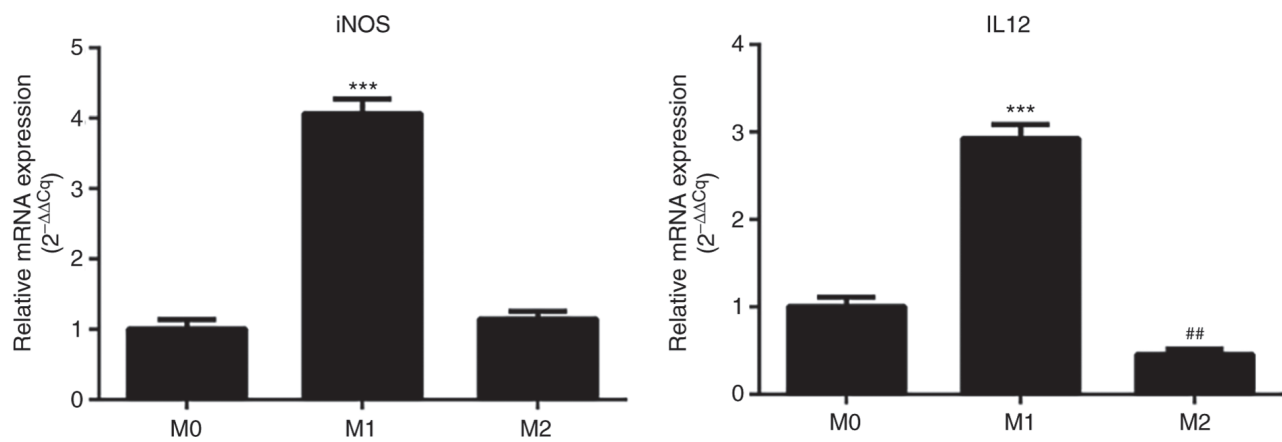

Supplement: Supplementary file 1 [file downloadSupplementary]
